# Supplementary material for: SARS-CoV-2 vaccine Alpha and Delta variant breakthrough infections are rare and mild, but happen relative early after vaccination
Source: bioRxiv or medRxiv preprint supplement (doi:10.1101/2021.12.23.21268324), 2021-12-24

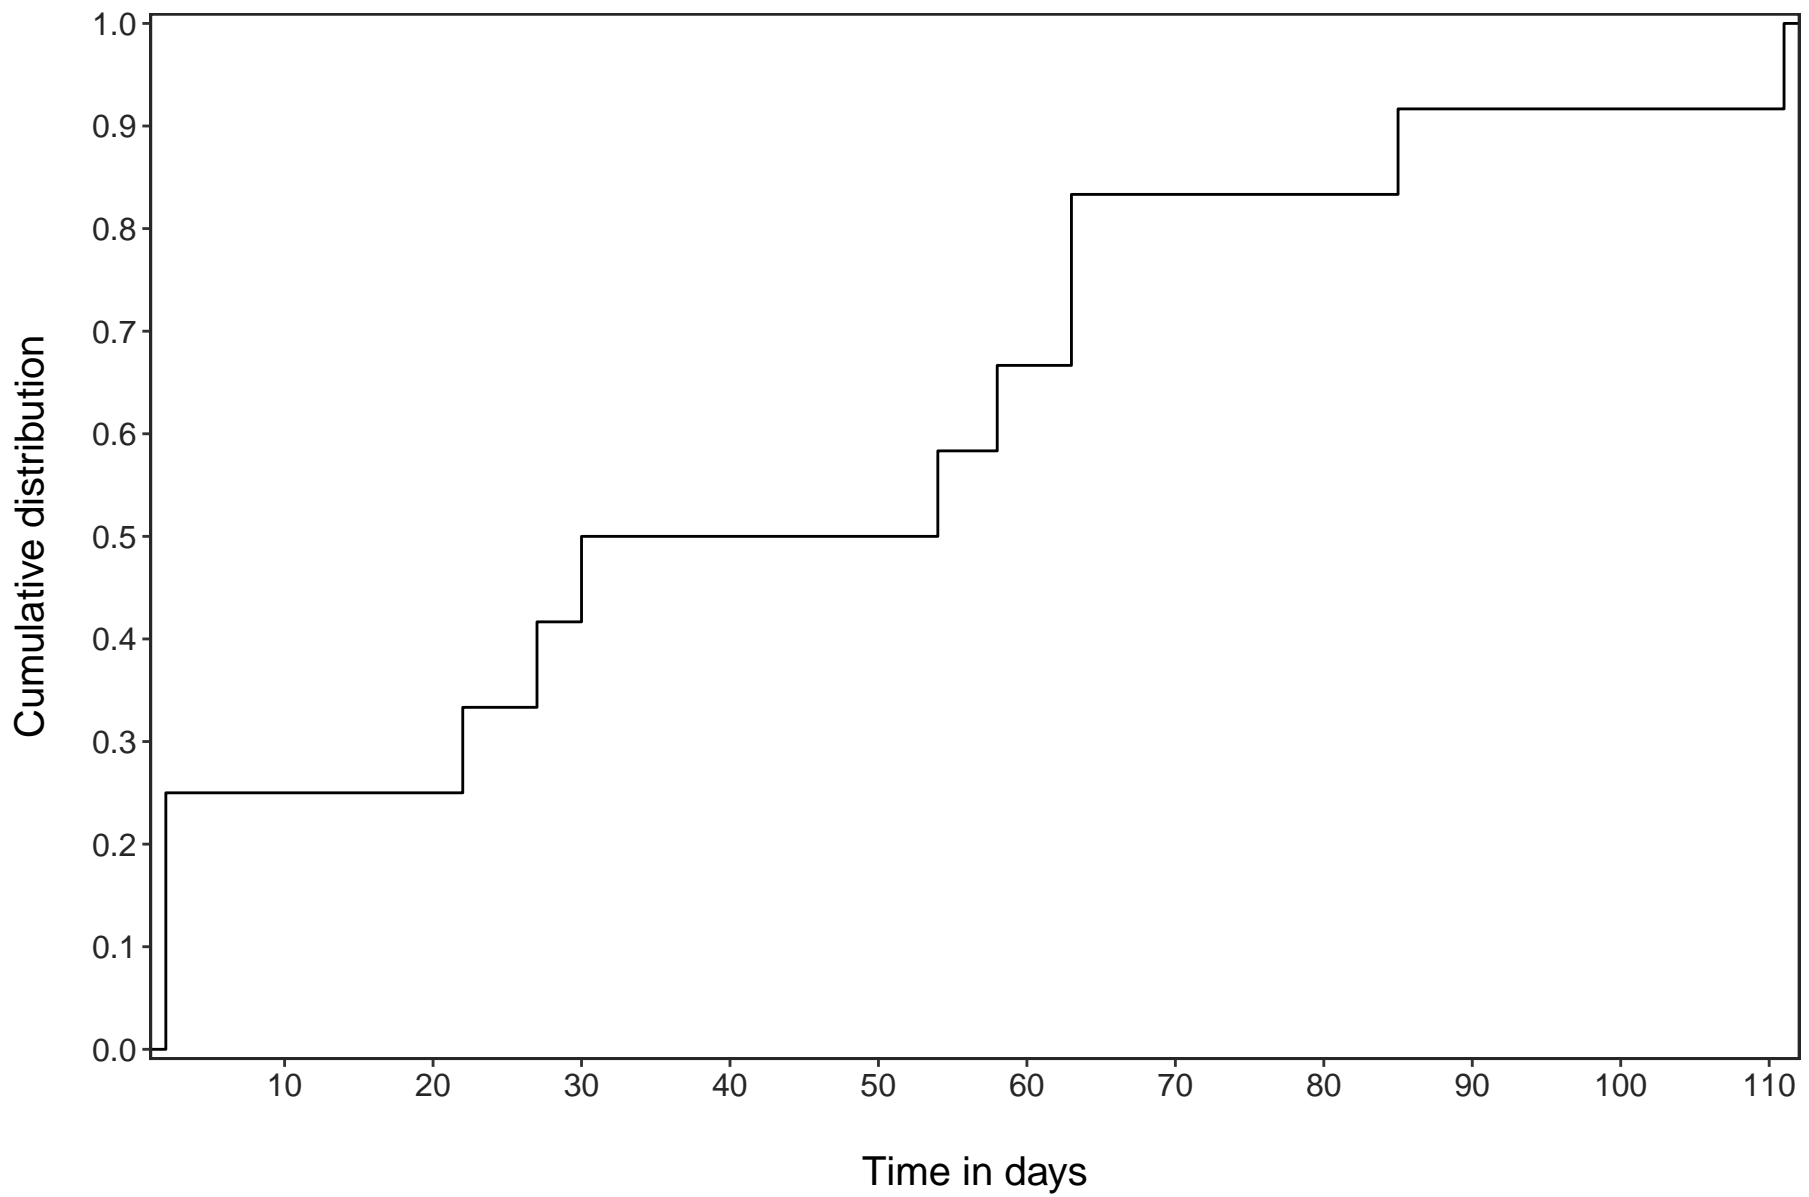

Supplement: Supplementary file [file media-3.pdf]
